# Supplementary material for: Application of Cloning-Free Genome Engineering to Escherichia coli
Source: MDPI journal article supplement (doi:10.3390/microorganisms11010215), 2023-01-15
Supplement: s1 [file s1]

## Supplementary Material

**Table S1.** *p*-values of the analysis of variance (ANOVA) performed using Tukey's pairwise test, among the different groups defined on the basis of the donor DNA used for transformation. Significant *p*-values are highlighted in grey.

|              | <i>hisF2</i> | <i>hisF3</i> | <i>hisF4</i> |
|--------------|--------------|--------------|--------------|
| <i>hisF</i>  | 0.0003394    | 0.0001713    | 0.0001628    |
| <i>hisF2</i> |              | 0.957        | 0.9473       |
| <i>hisF3</i> |              |              | 1            |

**Table S2.** *p*-values of the analysis of variance (ANOVA) performed using Tukey's pairwise test, among the different groups defined on the basis of the different molecular rearrangement (group A: 1 *hisF* copy; group B: 2 or more *hisF* copies; group C: chromosomal revertants). Significant *p*-values are highlighted in grey.

|   | B        | C        |
|---|----------|----------|
| A | 1,05E-08 | 0.005725 |
| B |          | 8,36E-10 |

**Table S3.** Transformation efficiency calculated for all the genes/gene fragments used in this study. Average number of transformants was calculated subtracting the number of chromosomal revertants (group C) from the number of obtained His<sup>+</sup> colonies.

| Name         | Donor DNA   |               | Average n. of transformants | Transformation efficiency (n. of transformants/μg of DNA) |
|--------------|-------------|---------------|-----------------------------|-----------------------------------------------------------|
|              | Length (bp) | Quantity (ng) |                             |                                                           |
| <i>hisF</i>  | 777         | 250           | 55.8                        | $2.2 \times 10^2$                                         |
| <i>hisF2</i> | 609         | 200           | 5.7                         | $2.9 \times 10^1$                                         |
| <i>hisF3</i> | 408         | 130           | 0.3                         | $2.3 \times 10^0$                                         |
| <i>hisF4</i> | 217         | 70            | 0.3                         | $4.3 \times 10^0$                                         |
| <i>hisIE</i> | 869         | 280           | 26                          | $9.3 \times 10^1$                                         |
